# Supplementary material for: Percolating conductive networks in multiwall carbon nanotube-filled polymeric nanocomposites: towards scalable high-conductivity applications of disordered systems
Source: Royal Society of Chemistry journal article supplement (doi:10.1039/c9nr00216b), 2019-01-01
Supplement: c9nr00216b1.pdf [file c9nr00216b1.pdf]

## Supporting Information

“Percolating Conductive Networks in Multiwall Carbon Nanotube-Filled Polymeric Nanocomposites: Towards Scalable High-Conductivity Applications of Disordered Systems”

Alexander J. Wang<sup>a</sup>, Kang-Shyang Liao<sup>a</sup>, Surendra Maharjan<sup>a</sup>, Zhuan Zhu<sup>b</sup>, Brian P. McElhenny<sup>a</sup>, Jiming Bao<sup>b</sup>, Seamus A. Curran<sup>a</sup>

<sup>a</sup> *Institute for NanoEnergy, Department of Physics, University of Houston, Science and Research Building 1, Houston, Texas 77023, USA*

<sup>b</sup> *Department of Electrical and Computer Engineering, University of Houston, Houston, Texas 77204, USA*

## S.1 Effect of Thin-Film Electrode Thickness Variations on Electronic Transport Properties

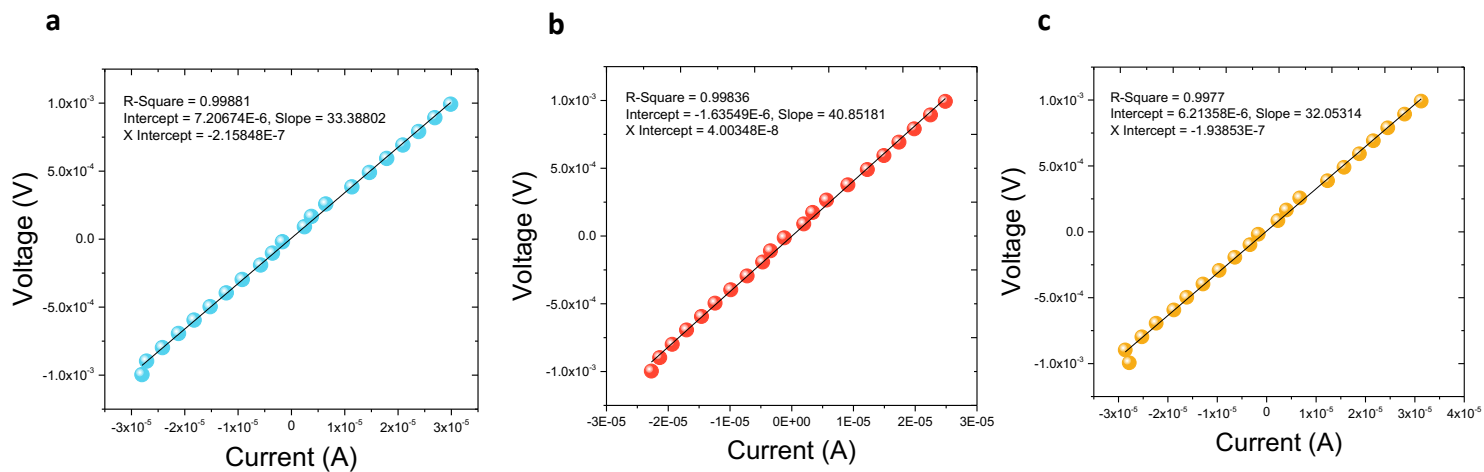

**Figure S1 | Effects of Thin-Film Electrode Thickness on Ohmic IV-Curves Across 10 wt.% MWCNT/PU Nanocomposites. (a)** Typical IV-curve taken for across a 10 wt.% MWCNT/PU composite using thin-film Au electrodes prepared with a Au - evaporation time of 21 min. **(b)** Typical IV-curve taken across a 10 wt.% MWCNT/PU composite using thin-film Au electrodes prepared with a Au - evaporation time of 42 min. **(c)** Typical IV-curve taken across a 10 wt.% MWCNT/PU composite using thin-film Au electrodes prepared with a Au -evaporation time of 63 min.

## S.2 Effect of Thin-Film Electrode Thickness Variations on Electronic Transport Properties

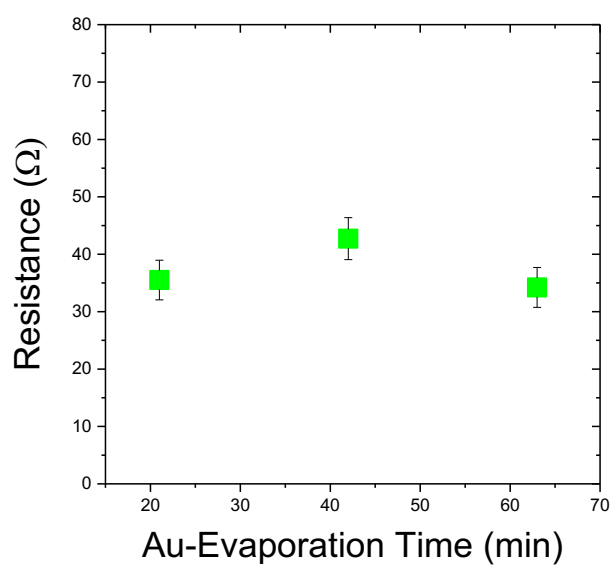

**Figure S2 | Mean Resistance Across 10 wt.% MWCNT/PU Nanocomposites Using Thin-Film Electrodes of Varying Thickness.** Varying the thin-film electrode thickness did not correspond to any appreciable change in resistance across a 10 wt.% MWCNT/PU composite.

### S.3 Variation in Thin-Film Electrode Thickness

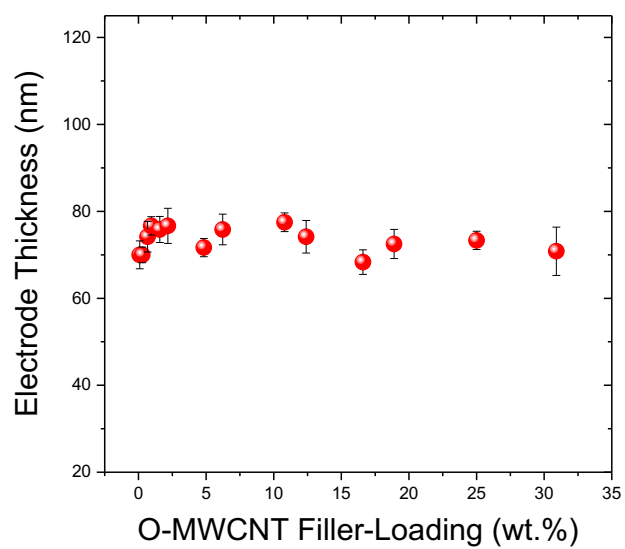

**Figure S3 | Variation in Thin-Film Au-Electrode Thickness.** A plot of the electrode thickness for each of the 14 different filler-loadings used to characterize the DC electronic transport properties of the O-MWCNT/PU nanocomposites assembled in this work.

## S.4 FE-SEM Micrograph of Pristine Polyurethane Microspheres

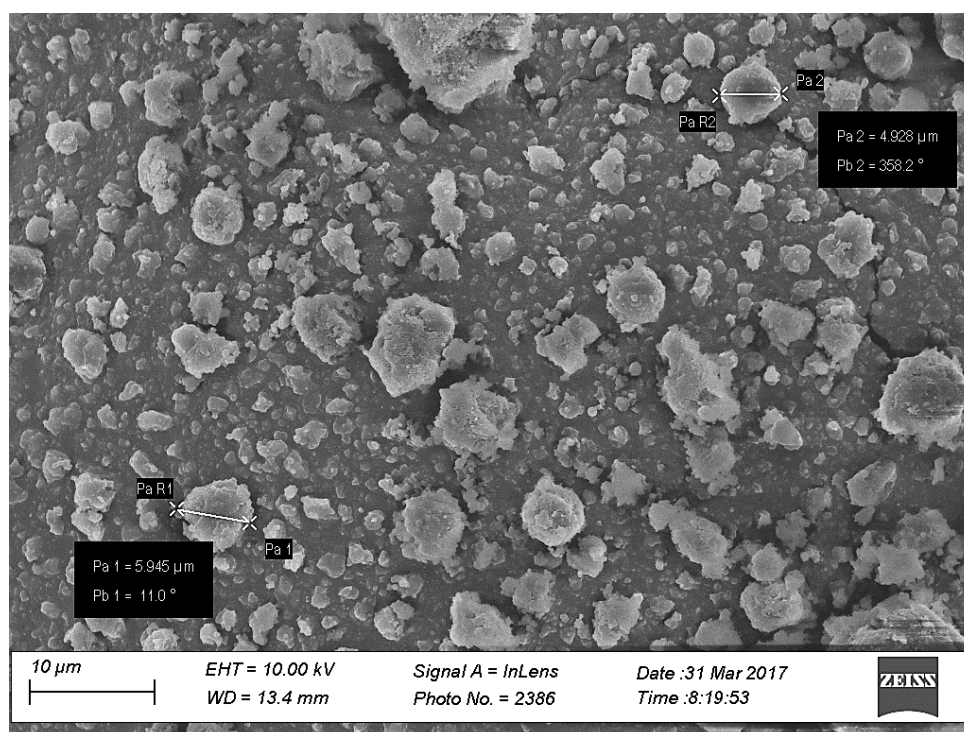

**Figure S4 | FE-SEM Micrograph of Neat PU.** FE-SEM micrograph illustrating the particle size and geometry of the pristine/neat PU microspheres used in this work in assembling MWCNT/PU nanocomposites.

## S.5 Electrical Conductivities of P-MWCNT/PU and O-MWCNT/PU Nanocomposites

| P-MWCNT Loading (wt.%) | $\sigma_c$ (S/cm)                             |
|------------------------|-----------------------------------------------|
| 0.10 %                 | $9.13 \times 10^{-3} \pm 0.13 \times 10^{-3}$ |
| 1.16 %                 | $2.05 \pm 0.03$                               |
| 1.58 %                 | $0.93 \pm 0.01$                               |
| 4.08 %                 | $19.18 \pm 0.27$                              |
| 6.37 %                 | $79.27 \pm 1.12$                              |
| 10.27 %                | $198.40 \pm 2.80$                             |
| 12.10 %                | $261.20 \pm 3.69$                             |
| 16.16 %                | $400.06 \pm 5.65$                             |
| 19.36 %                | $456.68 \pm 6.45$                             |
| 25.18 %                | $623.18 \pm 8.80$                             |
| 30.96 %                | $673.73 \pm 9.51$                             |

**Table S1 | Electrical Conductivity of P-MWCNT/PU Nanocomposites.** Electrical conductivities of the P-MWCNT/PU nanocomposites assembled in this work presented alongside the corresponding loading of P-MWCNTs.

| O-MWCNT Loading (wt.%)  | $\sigma_c$ (S/cm)              |
|-------------------------|--------------------------------|
| $9.31 \times 10^{-2}$ % | $0.12 \pm 6.64 \times 10^{-3}$ |
| 0.28 %                  | $0.15 \pm 7.98 \times 10^{-3}$ |
| 0.67 %                  | $0.08 \pm 4.63 \times 10^{-3}$ |
| 0.94 %                  | $0.32 \pm 0.02$                |
| 1.57 %                  | $1.69 \pm 0.09$                |
| 2.17 %                  | $9.75 \pm 0.61$                |
| 4.83 %                  | $15.40 \pm 0.69$               |
| 6.23 %                  | $33.50 \pm 1.95$               |
| 10.80 %                 | $182.00 \pm 15.09$             |
| 12.40 %                 | $257.00 \pm 15.57$             |
| 16.60 %                 | $342.00 \pm 18.45$             |
| 18.90 %                 | $615.00 \pm 35.11$             |
| 25.00 %                 | $783.00 \pm 34.82$             |
| 30.90 %                 | $839.00 \pm 71.62$             |

**Table S2 | Electrical Conductivity of O-MWCNT/PU Nanocomposites.** Electrical conductivities of the O-MWCNT/PU nanocomposites assembled in this work presented alongside the corresponding loading of O-MWCNTs.
